# Supplementary material for: Roxadustat promotes osteoblast differentiation and prevents estrogen deficiency-induced bone loss by stabilizing HIF-1α and activating the Wnt/β-catenin signaling pathway
Source: PubMed Central journal article supplement (PMC9124388; doi:10.1186/s13018-022-03162-w), 2022-05-21
Supplement: 13018_2022_3162_MOESM1_ESM.pdf [file 13018_2022_3162_MOESM1_ESM.pdf]

## Supplementary information

### Roxadustat promotes osteoblast differentiation and prevents estrogen deficiency-induced bone loss by stabilizing HIF-1 $\alpha$ and activating Wnt/ $\beta$ -catenin signaling pathway

Supplementary Table 1. The primer sequences for real-time PCR

| Gene          | Forward(5'-3')            | Reverse(5'-3')            |
|---------------|---------------------------|---------------------------|
| Runx2         | AAATTAACGCCAGTCGGAGC      | AGGACCGGGAACCACTTCTC      |
| Sp7           | AGGCCTTTGCCAGTGCCTA       | GCCAGATGGAAGCTGTGAAGA     |
| Alpl          | GCAGTATGAATTGAATCGGAACAAC | ATGGCCTGGTCCATCTCCAC      |
| Bglap         | TTCTGCTCACTCTGCTGACC      | TGCTTGGACATGAAGGCTTTG     |
| Vegfa         | GGAGTCTGTGCTCTGGGATTT     | CCGTTGGCACGATTTAAGAGG     |
| Glut1         | AGCAGAGGCTTGCTTGTAGAG     | ACGGACGCGCTGTAACATATG     |
| Pdk1          | GCAGACAGCTTACCTGAATCCT    | CAGTACAACCATGTATGCTCAGT   |
| Lef1          | CAGCGCGAGACAATTATGGC      | AGCTTCTCTTACCACCTGAAGT    |
| Myc           | TCAGCAACAACCGCAAGTG       | CGTTCCAAGACGTTGTGTGT      |
| Cend1         | TGCGTGCAGAAGGAGATTGT      | ACCTCCTCTTCGCACTTCTG      |
| Mmp7          | GCAGAATGTTCTGGTTAGAGAAG   | TCCTTGAGGTTGTCCACTAGACTAT |
| Hif1 $\alpha$ | GAATGAAGTGCACCCTAACAAG    | GAGGAATGGGTTCCAAAATCAG    |
| Actb          | GCAAGCAGGAGTACGATGAGT     | AAACGCAGCTCAGTAACAGTC     |

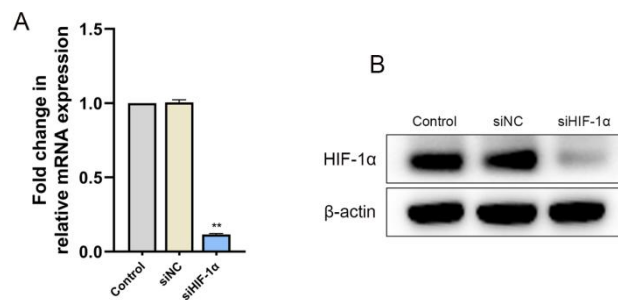

Supplementary Figure 1. The knockdown efficiency of siRNA against HIF-1 $\alpha$  at the mRNA and protein levels in osteoblasts. (A) The mRNA expression of HIF-1 $\alpha$  24h after transfection. (B) The protein expression of HIF-1 $\alpha$  48h after transfection. Data are presented as the mean $\pm$ SD of three independent experiments; \*\*P<0.01, compared with the siNC group.

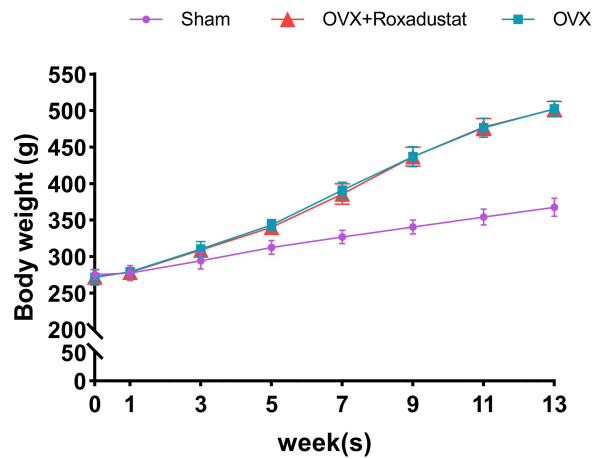

Supplementary Figure 2. Body weight changes during the 13-week experimental period in the Sham, OVX and OVX+Roxadustat groups. From week 3 to week 13, for each time point,  $P < 0.01$  among the three groups in the analysis of variance for repeated measurements, and  $P < 0.01$  between the OVX group (or OVX+Roxadustat group) and the sham group in the following multiple comparisons among the three groups. Week 0: the start time of ovariectomy; Week 1: the start time of roxadustat administration.
